# Supplementary material
Source: publisher site journal article supplement (https://www.dovepress.com/article/supplementary_file/543138/543138%20Revised%20Table%20S1-S3.xlsx)
Supplement: Supplementary file 1 [file 543138%20Revised%20Table%20S1-S3.xlsx]

## Sheet: Table S1  
Table S1 PlasmidA Sequencing Results
Gene ID	NR Description	Swiss-Prot Description	Pfam ID	Domain	Domain description	COG ID	COG Description	GO ID	GO Description	KO ID	KO Description	Located at GI
pA_gene0014	IS66 family transposase	Uncharacterized protein y4qI OS=Sinorhizobium fredii (strain NBRC 101917 / NGR234) OX=394 GN=NGR_a01890 PE=3 SV=1	PF03050;PF13817;PF13007;PF13005	DDE_Tnp_IS66;DDE_Tnp_IS66_C;LZ_Tnp_IS66;zf-IS66	Transposase IS66 family;IS66 C-terminal element;Transposase C of IS166 homeodomain;zinc-finger binding domain of transposase IS66	COG3436	Transposase	-	-	K07484	transposase	GI16
pA_gene0028	MULTISPECIES: hypothetical protein	-	-	-	-	-	-	-	-	-	-	-
pA_gene0026	MULTISPECIES: replication initiation protein RepM	Replication protein OS=Neisseria gonorrhoeae OX=485 PE=3 SV=1	PF01051;PF21205	Rep3_N;Rep3_C	Initiator Replication protein, WH1;Initiator Rep protein, WH2	COG5527	Protein involved in initiation of plasmid replication	GO:0006270;GO:0003887	DNA replication initiation;;DNA-directed DNA polymerase activity	-	-	-
pA_gene0013	MULTISPECIES: TonB-dependent receptor ZnuD2	Probable TonB-dependent receptor NMB0964 OS=Neisseria meningitidis serogroup B (strain MC58) OX=122586 GN=NMB0964 PE=1 SV=1	PF00593;PF07715	TonB_dep_Rec;Plug	TonB dependent receptor;TonB-dependent Receptor Plug Domain	COG1629	Outer membrane receptor protein, Fe transport	GO:0009279	cell outer membrane	K02014	iron complex outermembrane recepter protein	GI16
pA_gene0006	hypothetical protein	-	-	-	-	-	-	-	-	-	-	-
pA_gene0011	MULTISPECIES: BrnT family toxin	-	PF04365	BrnT_toxin	Ribonuclease toxin, BrnT, of type II toxin-antitoxin system	COG2929	Uncharacterized conserved protein, DUF497 family	-	-	K09803	uncharacterized protein	GI16
pA_gene0001	helix-turn-helix transcriptional regulator	-	PF01381	HTH_3	Helix-turn-helix	COG3620	Predicted transcriptional regulator, contains an XRE-type HTH domain (archaeal members contain CBS pair)	-	-	-	-	-
pA_gene0016	MULTISPECIES: transposase	Uncharacterized protein y4jB OS=Sinorhizobium fredii (strain NBRC 101917 / NGR234) OX=394 GN=NGR_a03140 PE=3 SV=1	PF01527	HTH_Tnp_1	Transposase	COG2963	Transposase InsE and inactivated derivatives	GO:0006313;GO:0003677;GO:0004803	DNA transposition;;DNA binding;;transposase activity	K07483	transposase	GI16
pA_gene0027	MULTISPECIES: plasmid replication DNA-binding protein	-	-	-	-	-	-	GO:0003677	DNA binding	-	-	-
pA_gene0024	hypothetical protein	-	-	-	-	-	-	-	-	-	-	-
pA_gene0010	MULTISPECIES: hypothetical protein	-	-	-	-	-	-	-	-	-	-	GI16
pA_gene0032	IS66 family transposase	Uncharacterized protein y4qI OS=Sinorhizobium fredii (strain NBRC 101917 / NGR234) OX=394 GN=NGR_a01890 PE=3 SV=1	PF03050;PF13817;PF13007;PF13005	DDE_Tnp_IS66;DDE_Tnp_IS66_C;LZ_Tnp_IS66;zf-IS66	Transposase IS66 family;IS66 C-terminal element;Transposase C of IS166 homeodomain;zinc-finger binding domain of transposase IS66	COG3436	Transposase	-	-	K07484	transposase	-
pA_gene0019	MULTISPECIES: XRE family transcriptional regulator	Antitoxin HigA1 OS=Mycobacterium tuberculosis (strain ATCC 25618 / H37Rv) OX=83332 GN=higA1 PE=1 SV=1	PF01381;PF12844;PF13744	HTH_3;HTH_19;HTH_37	Helix-turn-helix;Helix-turn-helix domain;Helix-turn-helix domain	COG3620	Predicted transcriptional regulator, contains an XRE-type HTH domain (archaeal members contain CBS pair)	GO:0003677	DNA binding	-	-	GI16
pA_gene0017	MULTISPECIES: DIP1984 family protein	-	PF20935	DUF6847	Family of unknown function (DUF6847)	-	-	-	-	-	-	GI16
pA_gene0021	-	-	-	-	-	-	-	-	-	-	-	GI16
pA_gene0025	mobA/MobL family protein	Mobilization protein A OS=Escherichia coli OX=562 GN=mobA PE=1 SV=4	PF03389	MobA_MobL	MobA/MobL family	-	-	-	-	K03546	DNA repair protein SbcC/Rad50	-
pA_gene0005	hypothetical protein	-	-	-	-	-	-	-	-	-	-	-
pA_gene0022	MULTISPECIES: hypothetical protein	-	-	-	-	-	-	-	-	-	-	GI16
pA_gene0030	BrnA antitoxin family protein	-	PF14384	BrnA_antitoxin	BrnA antitoxin of type II toxin-antitoxin system	COG3514	Uncharacterized conserved protein, DUF4415 family	-	-	-	-	-
pA_gene0009	MULTISPECIES: plasmid replication DNA-binding protein	-	-	-	-	-	-	GO:0003677	DNA binding	-	-	GI16
pA_gene0018	MULTISPECIES: hypothetical protein	-	-	-	-	-	-	-	-	-	-	GI16
pA_gene0008	MULTISPECIES: replication initiation protein RepM	Replication protein OS=Neisseria gonorrhoeae OX=485 PE=3 SV=1	PF01051;PF21205	Rep3_N;Rep3_C	Initiator Replication protein, WH1;Initiator Rep protein, WH2	COG5527	Protein involved in initiation of plasmid replication	GO:0006270;GO:0003887	DNA replication initiation;;DNA-directed DNA polymerase activity	-	-	-
pA_gene0023	hypothetical protein	-	-	-	-	-	-	-	-	-	-	GI16
pA_gene0034	MULTISPECIES: transposase	Uncharacterized protein y4jB OS=Sinorhizobium fredii (strain NBRC 101917 / NGR234) OX=394 GN=NGR_a03140 PE=3 SV=1	PF01527	HTH_Tnp_1	Transposase	COG2963	Transposase InsE and inactivated derivatives	GO:0006313;GO:0003677;GO:0004803	DNA transposition;;DNA binding;;transposase activity	K07483	transposase	-
pA_gene0035	MULTISPECIES: DIP1984 family protein	-	PF20935	DUF6847	Family of unknown function (DUF6847)	-	-	-	-	-	-	-
pA_gene0031	MULTISPECIES: TonB-dependent receptor ZnuD2	Probable TonB-dependent receptor NMB0964 OS=Neisseria meningitidis serogroup B (strain MC58) OX=122586 GN=NMB0964 PE=1 SV=1	PF00593;PF07715	TonB_dep_Rec;Plug	TonB dependent receptor;TonB-dependent Receptor Plug Domain	COG1629	Outer membrane receptor protein, Fe transport	GO:0009279	cell outer membrane	K02014	iron complex outermembrane recepter protein	-
pA_gene0033	IS66 family insertion sequence element accessory protein TnpB	Uncharacterized protein y4jC OS=Sinorhizobium fredii (strain NBRC 101917 / NGR234) OX=394 GN=NGR_a03130 PE=3 SV=1	PF05717	TnpB_IS66	IS66 Orf2 like protein	COG3436	Transposase	-	-	K07484	transposase	-
pA_gene0029	MULTISPECIES: BrnT family toxin	-	PF04365	BrnT_toxin	Ribonuclease toxin, BrnT, of type II toxin-antitoxin system	COG2929	Uncharacterized conserved protein, DUF497 family	-	-	K09803	uncharacterized protein	-
pA_gene0012	BrnA antitoxin family protein	-	PF14384	BrnA_antitoxin	BrnA antitoxin of type II toxin-antitoxin system	COG3514	Uncharacterized conserved protein, DUF4415 family	-	-	-	-	GI16
pA_gene0015	IS66 family insertion sequence element accessory protein TnpB	Uncharacterized protein y4jC OS=Sinorhizobium fredii (strain NBRC 101917 / NGR234) OX=394 GN=NGR_a03130 PE=3 SV=1	PF05717	TnpB_IS66	IS66 Orf2 like protein	COG3436	Transposase	-	-	K07484	transposase	GI16
pA_gene0004	MULTISPECIES: hypothetical protein	-	-	-	-	-	-	-	-	-	-	-
pA_gene0003	-	-	-	-	-	-	-	-	-	-	-	-
pA_gene0002	MULTISPECIES: type II toxin-antitoxin system RelE/ParE family toxin	Putative toxin HigB2 OS=Mycobacterium tuberculosis (strain ATCC 25618 / H37Rv) OX=83332 GN=higB2 PE=1 SV=1	PF05973	Gp49	Phage derived protein Gp49-like (DUF891)	COG4683	Uncharacterized conserved protein	-	-	-	-	-
pA_gene0007	mobA/MobL family protein	Mobilization protein A OS=Escherichia coli OX=562 GN=mobA PE=1 SV=4	PF03389	MobA_MobL	MobA/MobL family	-	-	-	-	K03546	DNA repair protein SbcC/Rad50	-
pA_gene0020	MULTISPECIES: type II toxin-antitoxin system RelE/ParE family toxin	Putative toxin HigB2 OS=Mycobacterium tuberculosis (strain ATCC 25618 / H37Rv) OX=83332 GN=higB2 PE=1 SV=1	PF05973	Gp49	Phage derived protein Gp49-like (DUF891)	COG4683	Uncharacterized conserved protein	-	-	-	-	GI16

## Sheet: Table S2
Table S2 Virulence gene results of A. baumannii I2
Gene ID	Vfs	Description	VFcategory
gene0145	T6SS (VF1337)	T6SS delivers protein effectors into host cells or competing bacteria and exists as an important virulence system in A. baumannii	Effector delivery system
gene0179	LPS (VF0466)	Evasion of the host immune response, triggering the host inflammatory response	Immune modulation
gene0323	TFP (VF1334)	Essential for twitching motility and natural competence, and contribute to host cell adherence	Adherence
gene0324	TFP (VF1334)	Essential for twitching motility and natural competence, and contribute to host cell adherence	Adherence
gene0325	TFP (VF1334)	Essential for twitching motility and natural competence, and contribute to host cell adherence	Adherence
gene0326	TFP (VF1334)	Essential for twitching motility and natural competence, and contribute to host cell adherence	Adherence
gene0327	TFP (VF1334)	Essential for twitching motility and natural competence, and contribute to host cell adherence	Adherence
gene0337	TFP (VF1334)	Essential for twitching motility and natural competence, and contribute to host cell adherence	Adherence
gene0347	TFP (VF1334)	Essential for twitching motility and natural competence, and contribute to host cell adherence	Adherence
gene0348	TFP (VF1334)	Essential for twitching motility and natural competence, and contribute to host cell adherence	Adherence
gene0349	TFP (VF1334)	Essential for twitching motility and natural competence, and contribute to host cell adherence	Adherence
gene0350	TFP (VF1334)	Essential for twitching motility and natural competence, and contribute to host cell adherence	Adherence
gene0351	TFP (VF1334)	Essential for twitching motility and natural competence, and contribute to host cell adherence	Adherence
gene0352	TFP (VF1334)	Essential for twitching motility and natural competence, and contribute to host cell adherence	Adherence
gene0353	TFP (VF1334)	Essential for twitching motility and natural competence, and contribute to host cell adherence	Adherence
gene0532	Phospholipase D (VF0469)	Contribute to the pathogenesis by aiding in the lysis of host cells, via cleavage of phospholipids present in the host cell membrane, and by degrading phospholipids present at mucosal barriers to facilitate bacterial invasion	Exotoxin
gene0633	TFP (VF1334)	Essential for twitching motility and natural competence, and contribute to host cell adherence	Adherence
gene0634	OmpA (VF0464)	OmpA localized to the mitochondria and induced apoptosis through the release of the proapoptotic molecules cytochrome c and apoptosis-inducing factor; facilitates the persistence and survival of A. baumannii by assisting biofilm formation and surface motility; interacts with soluble inhibitors of the alternative complement pathway and allows the bacteria to avoid complement-mediated killing; play…	Immune modulation
gene0667	TFP (VF1334)	Essential for twitching motility and natural competence, and contribute to host cell adherence	Adherence
gene0668	TFP (VF1334)	Essential for twitching motility and natural competence, and contribute to host cell adherence	Adherence
gene0669	TFP (VF1334)	Essential for twitching motility and natural competence, and contribute to host cell adherence	Adherence
gene0670	TFP (VF1334)	Essential for twitching motility and natural competence, and contribute to host cell adherence	Adherence
gene0790	Bap (VF0462)	Contributes to biofilm formation and adhesion to eukaryotic host cells	Biofilm
gene0878	LPS (VF0466)	Evasion of the host immune response, triggering the host inflammatory response	Immune modulation
gene1108	Acinetobactin (VF0467)	High-affinity catechol-hydroxamate siderophore competing with host cells for iron	Nutritional/Metabolic factor
gene1109	Acinetobactin (VF0467)	High-affinity catechol-hydroxamate siderophore competing with host cells for iron	Nutritional/Metabolic factor
gene1110	Acinetobactin (VF0467)	High-affinity catechol-hydroxamate siderophore competing with host cells for iron	Nutritional/Metabolic factor
gene1113	Acinetobactin (VF0467)	High-affinity catechol-hydroxamate siderophore competing with host cells for iron	Nutritional/Metabolic factor
gene1114	Acinetobactin (VF0467)	High-affinity catechol-hydroxamate siderophore competing with host cells for iron	Nutritional/Metabolic factor
gene1115	Acinetobactin (VF0467)	High-affinity catechol-hydroxamate siderophore competing with host cells for iron	Nutritional/Metabolic factor
gene1116	Acinetobactin (VF0467)	High-affinity catechol-hydroxamate siderophore competing with host cells for iron	Nutritional/Metabolic factor
gene1117	Acinetobactin (VF0467)	High-affinity catechol-hydroxamate siderophore competing with host cells for iron	Nutritional/Metabolic factor
gene1118	Acinetobactin (VF0467)	High-affinity catechol-hydroxamate siderophore competing with host cells for iron	Nutritional/Metabolic factor
gene1119	Acinetobactin (VF0467)	High-affinity catechol-hydroxamate siderophore competing with host cells for iron	Nutritional/Metabolic factor
gene1120	Acinetobactin (VF0467)	High-affinity catechol-hydroxamate siderophore competing with host cells for iron	Nutritional/Metabolic factor
gene1121	Acinetobactin (VF0467)	High-affinity catechol-hydroxamate siderophore competing with host cells for iron	Nutritional/Metabolic factor
gene1122	Acinetobactin (VF0467)	High-affinity catechol-hydroxamate siderophore competing with host cells for iron	Nutritional/Metabolic factor
gene1124	Acinetobactin (VF0467)	High-affinity catechol-hydroxamate siderophore competing with host cells for iron	Nutritional/Metabolic factor
gene1125	Acinetobactin (VF0467)	High-affinity catechol-hydroxamate siderophore competing with host cells for iron	Nutritional/Metabolic factor
gene1126	Acinetobactin (VF0467)	High-affinity catechol-hydroxamate siderophore competing with host cells for iron	Nutritional/Metabolic factor
gene1127	Acinetobactin (VF0467)	High-affinity catechol-hydroxamate siderophore competing with host cells for iron	Nutritional/Metabolic factor
gene1128	Acinetobactin (VF0467)	High-affinity catechol-hydroxamate siderophore competing with host cells for iron	Nutritional/Metabolic factor
gene1197	AdeFGH efflux pump (VF0504)	Play a potential role in the synthesis and transport of autoinducer molecules during biofilm formation	Biofilm
gene1198	AdeFGH efflux pump (VF0504)	Play a potential role in the synthesis and transport of autoinducer molecules during biofilm formation	Biofilm
gene1199	AdeFGH efflux pump (VF0504)	Play a potential role in the synthesis and transport of autoinducer molecules during biofilm formation	Biofilm
gene1214	T2SS (VF1335)	Secretes multiple effectors that were shown to be required for virulence in?vivo, including the lipoyl synthases LipA and LipH as well as the protease CpaA	Effector delivery system
gene1247	T2SS (VF1335)	Secretes multiple effectors that were shown to be required for virulence in?vivo, including the lipoyl synthases LipA and LipH as well as the protease CpaA	Effector delivery system
gene1248	T2SS (VF1335)	Secretes multiple effectors that were shown to be required for virulence in?vivo, including the lipoyl synthases LipA and LipH as well as the protease CpaA	Effector delivery system
gene1337	PNAG (VF0472)	Critical for biofilm formation	Biofilm
gene1338	PNAG (VF0472)	Critical for biofilm formation	Biofilm
gene1339	PNAG (VF0472)	Critical for biofilm formation	Biofilm
gene1453	Phospholipase C (VF0470)	Contribute to the pathogenesis by aiding in the lysis of host cells, via cleavage of phospholipids present in the host cell membrane, and by degrading phospholipids present at mucosal barriers to facilitate bacterial invasion	Exotoxin
gene1516	LPS (VF0466)	Evasion of the host immune response, triggering the host inflammatory response	Immune modulation
gene1518	LPS (VF0466)	Evasion of the host immune response, triggering the host inflammatory response	Immune modulation
gene1909	LPS (VF0466)	Evasion of the host immune response, triggering the host inflammatory response	Immune modulation
gene1994	T2SS (VF1335)	Secretes multiple effectors that were shown to be required for virulence in?vivo, including the lipoyl synthases LipA and LipH as well as the protease CpaA	Effector delivery system
gene1996	T2SS (VF1335)	Secretes multiple effectors that were shown to be required for virulence in?vivo, including the lipoyl synthases LipA and LipH as well as the protease CpaA	Effector delivery system
gene1997	T2SS (VF1335)	Secretes multiple effectors that were shown to be required for virulence in?vivo, including the lipoyl synthases LipA and LipH as well as the protease CpaA	Effector delivery system
gene2322	T6SS (VF1337)	T6SS delivers protein effectors into host cells or competing bacteria and exists as an important virulence system in A. baumannii	Effector delivery system
gene2696	HemO cluster (VF0636)	Current studies show the hemO gene cluster is required for optimal utilization of heme in A. baumannii hypervirulent strains; The hemO gene cluster encodes a secreted hemophore.	Nutritional/Metabolic factor
gene2697	HemO cluster (VF0636)	Current studies show the hemO gene cluster is required for optimal utilization of heme in A. baumannii hypervirulent strains; The hemO gene cluster encodes a secreted hemophore.	Nutritional/Metabolic factor
gene2698	HemO cluster (VF0636)	Current studies show the hemO gene cluster is required for optimal utilization of heme in A. baumannii hypervirulent strains; The hemO gene cluster encodes a secreted hemophore.	Nutritional/Metabolic factor
gene2699	HemO cluster (VF0636)	Current studies show the hemO gene cluster is required for optimal utilization of heme in A. baumannii hypervirulent strains; The hemO gene cluster encodes a secreted hemophore.	Nutritional/Metabolic factor
gene2700	HemO cluster (VF0636)	Current studies show the hemO gene cluster is required for optimal utilization of heme in A. baumannii hypervirulent strains; The hemO gene cluster encodes a secreted hemophore.	Nutritional/Metabolic factor
gene2701	HemO cluster (VF0636)	Current studies show the hemO gene cluster is required for optimal utilization of heme in A. baumannii hypervirulent strains; The hemO gene cluster encodes a secreted hemophore.	Nutritional/Metabolic factor
gene2702	HemO cluster (VF0636)	Current studies show the hemO gene cluster is required for optimal utilization of heme in A. baumannii hypervirulent strains; The hemO gene cluster encodes a secreted hemophore.	Nutritional/Metabolic factor
gene2703	HemO cluster (VF0636)	Current studies show the hemO gene cluster is required for optimal utilization of heme in A. baumannii hypervirulent strains; The hemO gene cluster encodes a secreted hemophore.	Nutritional/Metabolic factor
gene2704	HemO cluster (VF0636)	Current studies show the hemO gene cluster is required for optimal utilization of heme in A. baumannii hypervirulent strains; The hemO gene cluster encodes a secreted hemophore.	Nutritional/Metabolic factor
gene2705	HemO cluster (VF0636)	Current studies show the hemO gene cluster is required for optimal utilization of heme in A. baumannii hypervirulent strains; The hemO gene cluster encodes a secreted hemophore.	Nutritional/Metabolic factor
gene2844	TFP (VF1334)	Essential for twitching motility and natural competence, and contribute to host cell adherence	Adherence
gene2845	TFP (VF1334)	Essential for twitching motility and natural competence, and contribute to host cell adherence	Adherence
gene3105	T2SS (VF1335)	Secretes multiple effectors that were shown to be required for virulence in?vivo, including the lipoyl synthases LipA and LipH as well as the protease CpaA	Effector delivery system
gene3215	TFP (VF1334)	Essential for twitching motility and natural competence, and contribute to host cell adherence	Adherence
gene3283	LPS (VF0466)	Evasion of the host immune response, triggering the host inflammatory response	Immune modulation
gene3284	LPS (VF0466)	Evasion of the host immune response, triggering the host inflammatory response	Immune modulation
gene3288	TFP (VF1334)	Essential for twitching motility and natural competence, and contribute to host cell adherence	Adherence
gene3345	T2SS (VF1335)	Secretes multiple effectors that were shown to be required for virulence in?vivo, including the lipoyl synthases LipA and LipH as well as the protease CpaA	Effector delivery system
gene3346	T2SS (VF1335)	Secretes multiple effectors that were shown to be required for virulence in?vivo, including the lipoyl synthases LipA and LipH as well as the protease CpaA	Effector delivery system
gene3385	TFP (VF1334)	Essential for twitching motility and natural competence, and contribute to host cell adherence	Adherence
gene3386	TFP (VF1334)	Essential for twitching motility and natural competence, and contribute to host cell adherence	Adherence
gene3387	TFP (VF1334)	Essential for twitching motility and natural competence, and contribute to host cell adherence	Adherence
gene3444	T2SS (VF1335)	Secretes multiple effectors that were shown to be required for virulence in?vivo, including the lipoyl synthases LipA and LipH as well as the protease CpaA	Effector delivery system
gene3445	T2SS (VF1335)	Secretes multiple effectors that were shown to be required for virulence in?vivo, including the lipoyl synthases LipA and LipH as well as the protease CpaA	Effector delivery system
gene3446	T2SS (VF1335)	Secretes multiple effectors that were shown to be required for virulence in?vivo, including the lipoyl synthases LipA and LipH as well as the protease CpaA	Effector delivery system
gene3476	PbpG (VF0468)	Penicillin-binding proteins (PBPs) are most commonly associated with binding to and inactivating b-lactam antibiotics; PBPs also participate in the final steps of the biosynthesis of the peptidoglycan layer and thus contribute to bacterial cell stability	Immune modulation
gene3478	TFP (VF1334)	Essential for twitching motility and natural competence, and contribute to host cell adherence	Adherence
gene3479	TFP (VF1334)	Essential for twitching motility and natural competence, and contribute to host cell adherence	Adherence
gene3573	TFP (VF1334)	Essential for twitching motility and natural competence, and contribute to host cell adherence	Adherence
gene3626	Quorom sensing (VF0471)	Quorum Sensing plays a significant role in biofilm formation.	Biofilm
gene3628	Quorom sensing (VF0471)	Quorum Sensing plays a significant role in biofilm formation.	Biofilm
gene3652	T6SS (VF1337)	T6SS delivers protein effectors into host cells or competing bacteria and exists as an important virulence system in A. baumannii	Effector delivery system
gene3669	Capsule (VF0465)	Plays an important role in protecting bacteria from the host innate immune response	Immune modulation
gene3670	Capsule (VF0465)	Plays an important role in protecting bacteria from the host innate immune response	Immune modulation
gene3671	Capsule (VF0465)	Plays an important role in protecting bacteria from the host innate immune response	Immune modulation
gene3673	Capsule (VF0465)	Plays an important role in protecting bacteria from the host innate immune response	Immune modulation
gene3687	Capsule (VF0465)	Plays an important role in protecting bacteria from the host innate immune response	Immune modulation
gene3688	Capsule (VF0465)	Plays an important role in protecting bacteria from the host innate immune response	Immune modulation
gene3689	Capsule (VF0465)	Plays an important role in protecting bacteria from the host innate immune response	Immune modulation
gene3696	Phospholipase C (VF0470)	Contribute to the pathogenesis by aiding in the lysis of host cells, via cleavage of phospholipids present in the host cell membrane, and by degrading phospholipids present at mucosal barriers to facilitate bacterial invasion	Exotoxin

## Sheet: Table S3
Table S3 Secretion systems results of A. baumannii I2
Gene ID	Location	NR Description	Pathway Gene Name	KO ID	KO Description	Type
gene0145	Chromosome	MULTISPECIES: type VI secretion system Vgr family protein	vgrG	K11904	type VI secretion system secreted protein VgrG	Type VI Secretion System
gene2321	Chromosome	RHS repeat-associated core domain-containing protein	vgrG	K11904	type VI secretion system secreted protein VgrG	Type VI Secretion System
gene2322	Chromosome	MULTISPECIES: type VI secretion system Vgr family protein	vgrG	K11904	type VI secretion system secreted protein VgrG	Type VI Secretion System
gene2464	Chromosome	RHS repeat-associated core domain-containing protein	vgrG	K11904	type VI secretion system secreted protein VgrG	Type VI Secretion System
gene2465	Chromosome	RHS repeat protein	vgrG	K11904	type VI secretion system secreted protein VgrG	Type VI Secretion System
gene2466	Chromosome	type VI secretion system Vgr family protein	vgrG	K11904	type VI secretion system secreted protein VgrG	Type VI Secretion System
gene3652	Chromosome	type VI secretion system Vgr family protein	vgrG	K11904	type VI secretion system secreted protein VgrG	Type VI Secretion System
gene0456	Chromosome	MULTISPECIES: preprotein translocase subunit SecY	secY	K03076	preprotein translocase subunit SecY	Sec-SRP Secretion System
gene0559	Chromosome	protein translocase subunit SecF	secF	K03074	preprotein translocase subunit SecF	Sec-SRP Secretion System
gene0560	Chromosome	MULTISPECIES: protein translocase subunit SecD	secD	K03072	preprotein translocase subunit SecD	Sec-SRP Secretion System
gene0561	Chromosome	MULTISPECIES: preprotein translocase subunit YajC	yajC	K03210	preprotein translocase subunit YajC	Sec-SRP Secretion System
gene0613	Chromosome	MULTISPECIES: preprotein translocase subunit SecA	secA	K03070	preprotein translocase subunit SecA [EC:7.4.2.8]	Sec-SRP Secretion System
gene0869	Chromosome	TolC family protein	tolC	K12340	outer membrane protein	Type I Secretion System
gene1756	Chromosome	MULTISPECIES: TolC family protein	tolC	K12340	outer membrane protein	Type I Secretion System
gene3458	Chromosome	type I secretion outer membrane protein, TolC family	tolC	K12340	outer membrane protein	Type I Secretion System
gene1214	Chromosome	MULTISPECIES: GspE/PulE family protein	gspE	K02454	general secretion pathway protein E [EC:7.4.2.8]	Type II Secretion System
gene3105	Chromosome	MULTISPECIES: type II secretion system ATPase GspE	gspE	K02454	general secretion pathway protein E [EC:7.4.2.8]	Type II Secretion System
gene1247	Chromosome	MULTISPECIES: type II secretion system protein GspL	gspL	K02461	general secretion pathway protein L	Type II Secretion System
gene1248	Chromosome	MULTISPECIES: type II secretion system protein GspM	gspM	K02462	general secretion pathway protein M	Type II Secretion System
gene1561	Chromosome	MULTISPECIES: signal recognition particle-docking protein FtsY	ftsY	K03110	fused signal recognition particle receptor	Sec-SRP Secretion System
gene1994	Chromosome	MULTISPECIES: type II secretion system minor pseudopilin GspK	gspK	K02460	general secretion pathway protein K	Type II Secretion System
gene1995	Chromosome	MULTISPECIES: type II secretion system minor pseudopilin GspJ	gspJ	K02459	general secretion pathway protein J	Type II Secretion System
gene1996	Chromosome	MULTISPECIES: type II secretion system minor pseudopilin GspI	gspI	K02458	general secretion pathway protein I	Type II Secretion System
gene1997	Chromosome	MULTISPECIES: type II secretion system protein	gspG	K02456	general secretion pathway protein G	Type II Secretion System
gene3345	Chromosome	MULTISPECIES: type II secretion system major pseudopilin GspG	gspG	K02456	general secretion pathway protein G	Type II Secretion System
gene2950	Chromosome	MULTISPECIES: signal recognition particle protein	ffh	K03106	signal recognition particle subunit SRP54 [EC:3.6.5.4]	Sec-SRP Secretion System
gene3188	Chromosome	MULTISPECIES: protein-export chaperone SecB	secB	K03071	preprotein translocase subunit SecB	Sec-SRP Secretion System
gene3247	Chromosome	MULTISPECIES: Sec-independent protein translocase subunit TatA	tatA	K03116	sec-independent protein translocase protein TatA	Tat Secretion System
gene3248	Chromosome	MULTISPECIES: Sec-independent protein translocase protein TatB	tatB	K03117	sec-independent protein translocase protein TatB	Tat Secretion System
gene3249	Chromosome	MULTISPECIES: twin-arginine translocase subunit TatC	tatC	K03118	sec-independent protein translocase protein TatC	Tat Secretion System
gene3346	Chromosome	type II secretion system inner membrane protein GspF	gspF	K02455	general secretion pathway protein F	Type II Secretion System
gene3383	Chromosome	MULTISPECIES: preprotein translocase subunit SecG	secG	K03075	preprotein translocase subunit SecG	Sec-SRP Secretion System
gene3434	Chromosome	MULTISPECIES: preprotein translocase subunit SecE	secE	K03073	preprotein translocase subunit SecE	Sec-SRP Secretion System
gene3444	Chromosome	MULTISPECIES: type II secretion system secretin GspD	gspD	K02453	general secretion pathway protein D	Type II Secretion System
gene3445	Chromosome	MULTISPECIES: type II secretion system protein N	gspC	K02452	general secretion pathway protein C	Type II Secretion System
gene3757	Chromosome	MULTISPECIES: membrane protein insertase YidC	yidC	K03217	YidC/Oxa1 family membrane protein insertase	Sec-SRP Secretion System
